# Supplementary material
Source: publisher figshare collection journal article supplement (https://tandf.figshare.com/ndownloader/files/14412155)
Supplement: Supplementary file 1 [file 14412155]

## Supplementary Materials

### 1. Summary of cash transfer programs and their effects on child health

**Table A1. Cash transfer programs and child health**

| Study                                               | Country      | Name of the Program                      | Recipient        | Eligibility or conditions                                                    | Monthly benefits/<br>estimated % of household<br>expenditure           | Age of<br>children | Effect size                                     |
|-----------------------------------------------------|--------------|------------------------------------------|------------------|------------------------------------------------------------------------------|------------------------------------------------------------------------|--------------------|-------------------------------------------------|
| <b>Pension programs</b>                             |              |                                          |                  |                                                                              |                                                                        |                    |                                                 |
| Case (2004)                                         | South Africa | Old-age pension program                  | Eligible elderly | Individual eligible age. Male: 65; Female: 60                                | 370 Rands (in 1993), twice the median per capita income in rural areas | 0–60 months        | +1 SD (HAZ ) or 5 cm (height)                   |
| Duflo (2003)                                        | South Africa | Old-age pension program                  | Eligible elderly | Individual eligible age. Male: 65; Female: 60                                | 370 Rands (in 1993), twice the median per capita income in rural areas | 6–60 months        | Woman for girls: +1.16 SD (HAZ); +1.19 SD (WHZ) |
| <b>Other cash transfer programs</b>                 |              |                                          |                  |                                                                              |                                                                        |                    |                                                 |
| Baulch (2010)                                       | Bangladesh   | <i>Primary Education Stipend</i>         | Women            | School enrollment and attendance.                                            | Unclear                                                                | 0–12 years old     | +0.4 SD (HAZ)                                   |
| Morris et al. (2004)                                | Brazil       | <i>Bolsa Alimentac, a ão</i>             | Unclear          | Condition for: 0–7 years old, PHC, GMP, immunisation.                        | 8%                                                                     | 0–7 years old      | No significant results were found               |
| Attanasio & Mesnard (2006)                          | Colombia     | <i>Familias en Accio ´n</i>              | Women            | Condition for: 0–6 years old, PHC.                                           | 24% <sup>a</sup>                                                       | 0–24 months        | +0.16 SD (HAZ)                                  |
| International Food Policy Research Institute (2003) | Honduras     | <i>Programa de Asignacio ´n Familiar</i> | Women            | Condition for: 0–3 years old, PHC                                            | 4%                                                                     | 0–60 months        | No significant results were found               |
| Sinha & Yoong (2009)                                | India        | <i>Apni Beti Apna Dhan</i>               | Women            | School enrollment and attendance.                                            | Unclear                                                                | 0–11 years old     | +0.34 SD (HAZ)                                  |
| Paxson & Schady (2010)                              | Ecuador      | <i>Bono de Desarrollo Humano</i>         | Women            | Condition for: 0–6 years old, PHC; school enrollment.                        | US \$15 (in 2003), 8.5% <sup>b</sup>                                   | 0–24 months        | +0.11 SD (HAZ)                                  |
| Gertler (2004)                                      | Mexico       | <i>Oportunidades (PROGRESA)</i>          | Women            | Condition for: 0–7 years old, PHC, GMP, immunisation ; school enrollment and | 20% to 30 %                                                            | 0–35 months        | + 1 cm (height); - 25.3 % (anemic)              |

---

|                         |           |                                            |       |                                                                                                  |                   |               |                                                                                        |
|-------------------------|-----------|--------------------------------------------|-------|--------------------------------------------------------------------------------------------------|-------------------|---------------|----------------------------------------------------------------------------------------|
|                         |           |                                            |       | attendance.                                                                                      |                   |               |                                                                                        |
| Rivera et al.<br>(2004) | Mexico    | <i>Oportunidades</i><br>(PROGRESA)         | Women | Condition for: 0–7 years old,<br>PHC, GMP, immunisation;<br>school enrollment and<br>attendance. | Rural: 25%        | 0–6 years old | Rural: +0.32 SD (HAZ)<br>or 1.1 cm (height)                                            |
| Leroy et al.<br>(2008)  | Mexico    | <i>Oportunidades</i><br>(PROGRESA)         | Women | Condition for: 0–7 years old,<br>PHC, GMP, immunisation;<br>school enrollment and<br>attendance. | Urban: 15% to 20% | 0–6 years old | Urban: +0.41 SD (HAZ)<br>or +1.53 cm (height);<br>+0.46 SD WHZ or +0.76<br>kg (weight) |
| Maluccio (2009)         | Nicaragua | <i>Red de Protecció'n</i><br><i>Social</i> | Women | Condition for: 0–5 years old,<br>PHC, vitamin supplementation,<br>immunisation.                  | 18%               | 0–60 months   | -5.5% (stunting)                                                                       |

---

6 <sup>a</sup> Estimated from Attanasio & Mesnard (2006). <sup>b</sup> Estimated from Paxson & Schady (2010). Abbreviation: GMP: Growth monitoring and promotion; PHC: Preventive health checkups

## 2. Variable summary statistics

**Table A2. Summary statistics**

| Variables                       | Total |        |       | 2012 |        |       | 2014 |        |       |
|---------------------------------|-------|--------|-------|------|--------|-------|------|--------|-------|
|                                 | Obs.  | Mean   | S.D.  | Obs. | Mean   | S.D.  | Obs. | Mean   | S.D.  |
| <b>Dependent variable</b>       |       |        |       |      |        |       |      |        |       |
| HAZ                             | 6972  | -1.06  | 2.07  | 3603 | -1.18  | 2.07  | 3369 | -0.95  | 2.06  |
| WAZ                             | 5409  | -0.28  | 1.59  | 2778 | -0.31  | 1.55  | 2631 | -0.25  | 1.62  |
| <b>Key independent variable</b> |       |        |       |      |        |       |      |        |       |
| NRPS (1=Yes)                    | 6972  | 0.20   | 0.40  | 3603 | 0.15   | 0.36  | 3369 | 0.25   | 0.43  |
| Number of pensioners            | 6972  | 0.26   | 0.57  | 3603 | 0.20   | 0.50  | 3369 | 0.33   | 0.63  |
| <b>Control variables</b>        |       |        |       |      |        |       |      |        |       |
| Gender (1=boys)                 | 6972  | 0.53   | 0.50  | 3603 | 0.53   | 0.50  | 3369 | 0.53   | 0.50  |
| Age                             | 6972  | 7.79   | 4.45  | 3603 | 7.78   | 4.51  | 3369 | 7.81   | 4.39  |
| Number of siblings              | 6972  | 0.90   | 0.97  | 3603 | 0.87   | 0.93  | 3369 | 0.94   | 1.01  |
| Number of elderly               | 6972  | 0.52   | 0.76  | 3603 | 0.47   | 0.74  | 3369 | 0.57   | 0.79  |
| Log ( family income per capita) | 6972  | 8.49   | 1.22  | 3603 | 8.35   | 1.23  | 3369 | 8.65   | 1.18  |
| Parents' age                    | 6972  | 34.95  | 6.78  | 3603 | 34.94  | 6.77  | 3369 | 34.95  | 6.79  |
| Parents' education (years)      | 6972  | 6.63   | 3.42  | 3603 | 6.54   | 3.42  | 3369 | 6.73   | 3.42  |
| Parents' height (cm)            | 6972  | 157.89 | 31.04 | 3603 | 156.32 | 34.35 | 3369 | 159.58 | 26.97 |
| Parents' weight (kg)            | 6972  | 58.30  | 13.75 | 3603 | 57.59  | 14.78 | 3369 | 59.06  | 12.51 |
| Parents' migration (1=Yes)      | 6972  | 0.41   | 0.49  | 3603 | 0.41   | 0.49  | 3369 | 0.40   | 0.49  |
| Parent height missing (1=Yes)   | 6972  | 0.04   | 0.19  | 3603 | 0.05   | 0.21  | 3369 | 0.03   | 0.16  |
| Parent weight missing (1=Yes)   | 6972  | 0.04   | 0.19  | 3603 | 0.05   | 0.21  | 3369 | 0.03   | 0.16  |

### 3. The prevalence effect and severity effect of the NRPS on child disease

Previous studies have shown that children of lower income families are more likely to suffer from health shocks and suffer greater after disease (Currie & Stabile, 2003; Suris, Michaud, & Viner, 2004). Cash transfers may reduce the prevalence of disease (prevalence effect) and buffer the adverse effect of health shocks on child health (severity effect). Following existing studies (Apouey & Geoffard, 2013; Goode & Mavromaras, 2014), we examined the prevalence effect and severity effect of the NRPS on child disease through probit regressions and linear regressions.

Table A3 presents the estimates of prevalence effect and severity effect of the NRPS on child disease and health shocks. The coefficients in column (1) and column (2) are not significant, which imply that the NRPS is not able to reduce the prevalence of child disease. The interaction term of child disease and the NRPS in column (3) and column (4) are not significant, although these coefficients are positive. For the interaction term of child hospitalization and the NRPS, similar results are found in column (5) and column (6), showing that the NRPS cannot alleviate the negative effect of diseases or health shocks on child health. The non-significant prevalence effect and severity effect of the NRPS could be mainly because of the low amount of the NRPS pension.

32

**Table A3. Prevalence effect and severity effect of NRPS**

| Variables                  | Prevalence Effect |                   |                    | Severity Effect    |                    |                   |
|----------------------------|-------------------|-------------------|--------------------|--------------------|--------------------|-------------------|
|                            | (1)               | (2)               | (3)                | (4)                | (5)                | (6)               |
|                            | Disease           | Hospitalization   | HAZ                | WAZ                | HAZ                | WAZ               |
| NRPS (1=Yes)               | 0.004<br>(0.017)  | -0.009<br>(0.016) | 0.194**<br>(0.085) | 0.139*<br>(0.076)  | 0.168**<br>(0.082) | 0.142*<br>(0.073) |
| Disease (1=Yes)            |                   |                   | 0.075<br>(0.061)   | -0.092*<br>(0.047) |                    |                   |
| Disease x NRPS             |                   |                   | 0.045<br>(0.132)   | 0.053<br>(0.109)   |                    |                   |
| Hospitalization<br>(1=Yes) |                   |                   |                    |                    | 0.094<br>(0.065)   | -0.068<br>(0.049) |
| Hospitalization x<br>NRPS  |                   |                   |                    |                    | 0.170<br>(0.143)   | 0.063<br>(0.115)  |
| Control variables          | Yes               | Yes               | Yes                | Yes                | Yes                | Yes               |
| Province dummies           | Yes               | Yes               | Yes                | Yes                | Yes                | Yes               |
| Year dummy                 | Yes               | Yes               | Yes                | Yes                | Yes                | Yes               |
| Observations               | 6960              | 6959              | 6961               | 5400               | 6961               | 5400              |
| Pseudo R <sup>2</sup>      | 0.058             | 0.060             | 0.107              | 0.136              | 0.136              | 0.107             |

Note: \* p<0.1, \*\* p<0.05, \*\*\* p<0.01; Huber-White robust standard errors are in parentheses.

33

34

35

#### 4. DD, PSMDD and IV regressions

The difference-in-difference (DD) approach in this study calculates the effect of social pensions (treatment) on child health (outcome) by comparing the average change over time in the outcome variable for the treatment group and the control group, which helps to eliminate unobserved heterogeneity if the two groups have common trends over time. To meet this precondition of the DD approach, we further adopted a propensity score matching with difference-in-difference (PSMDD) strategy to generate similar treatment and control groups in the baseline survey and then obtain the effect of the NRPS more accurately through DD analysis. Specifically, the difference-in-difference approach is applied as follows:

$$Z = \gamma_0 + \gamma_1 t + \gamma_2 T_i + \gamma_3 (t \times T_i) + X_i' \gamma + \lambda + \varepsilon_i \quad (3)$$

where  $t$  represents time periods before and after treatment. Since the NRPS policy was implemented from 2009, we dropped those observations whose family already had a pension receiver in 2012 and generated a balanced panel data for DD analysis. Thus, the baseline survey of DD approach is set in 2012 when  $t$  equals 0, otherwise  $t$  equals 1.  $T$  represents the treatment for a family. Specifically,  $T$  equals 1 if a family member received the NRPS pension in year 2014 and equals 0 otherwise.  $X$  is a set of control variables and  $\lambda$  captures the child-level fixed effect. The coefficient  $\gamma_3$  captures the effect of the NRPS on child health in DD approach. In the PSMDD strategy, we first matched the treatment group and control group in 2012 by using the nearest neighbor matching method (without replacement) and then dropped those observations that were not in the common support and generated another balanced panel dataset for DD analysis.

Furthermore, this study has also applied an IV approach to address possible endogeneity problems. The IV we used was the interaction term of the proportion of

other households which had NRPS pensioners in the same community (NRPS proportion) and whether the household had an age qualified member (eligible household). The main reason we generated and used this IV is because of the eligibility of social pensions. At least two conditions are required to receive the NRPS pensions in rural China. First, communities should have already started the policy. Second, the age of pensioners must be 60 or over. On the one hand, a higher proportion of households with NRPS pensioners generally represents a longer time the policy has been implemented in a community, which could be correlated with the NRPS participation probability of the elderly. Meanwhile, an increased number of pensioners in other families may have a “demonstration effect” that induces more older adults to become NRPS pensioners. On the other hand, the presence of an age-qualified family member could also correlate with the probability of having a NRPS pensioner in household. Moreover, the eligibility of social pensions is not likely to be directly associated with child health (Duflo, 2003). Although the IV may affect child health not only through the NRPS but also through other unobservable factors, it is difficult to test exogeneity without additional instruments, and we still used the IV approach as a robustness check.

The estimates of DD, PSMDD and 2SLS are reported in Table A4. It can be seen that results of the three approaches are consistent with the OLS estimates in this study. Specifically, the interaction terms in the DD approach are positively significant. Figure 1 shows that the kernel density of treatment group and control group are well balanced after matching and the results of PSMDD also support the positive effect of social pensions on child health. In terms of 2SLS regressions, the interaction terms of the NRPS proportion and eligible household are positively and significantly associated with the probability of the presence of pensioner in child’s family in the first stage regression. The F statistics on the instrument in the first stage regressions are much

greater than 10, indicating that the IV is not weak. The estimated results of the second stage regressions of 2SLS also show that the NRPS is positively associated with the HAZ and WAZ of children, which are also in line with the estimates of OLS regressions.

**Table A4. Estimates of DD, PSMDD and 2SLS**

| Variables         | DD                            |                                | PSMDD                         |                               | 2SLS                          |                               |
|-------------------|-------------------------------|--------------------------------|-------------------------------|-------------------------------|-------------------------------|-------------------------------|
|                   | (1)                           | (2)                            | (3)                           | (4)                           | (5)                           | (6)                           |
|                   | HAZ                           | WAZ                            | HAZ                           | WAZ                           | HAZ                           | WAZ                           |
| t×T               | 0.233 <sup>†</sup><br>(0.157) | 0.231 <sup>**</sup><br>(0.111) | 0.237 <sup>†</sup><br>(0.162) | 0.254 <sup>*</sup><br>(0.142) |                               |                               |
| NRPS (1=Yes)      |                               |                                |                               |                               | 0.171 <sup>†</sup><br>(0.122) | 0.180 <sup>*</sup><br>(0.107) |
| Control variables | Yes                           | Yes                            | Yes                           | Yes                           | Yes                           | Yes                           |
| Province dummies  | Yes                           | Yes                            | Yes                           | Yes                           | Yes                           | Yes                           |
| Year dummy        | Yes                           | Yes                            | Yes                           | Yes                           | Yes                           | Yes                           |
| Observations      | 3374                          | 2646                           | 3300                          | 2568                          | 6972                          | 5409                          |
| R <sup>2</sup>    | 0.052                         | 0.016                          | 0.044                         | 0.013                         | 0.106                         | 0.135                         |

Note: <sup>†</sup> p<0.15, \* p<0.1, \*\* p<0.05, \*\*\* p<0.01; Huber-White robust standard errors are in parentheses. Nearest neighbor matching is used and matching variables are those factors may affect NRPS participation of the elderly, including number of elderly, average age of elderly, average schooling years of elderly, log of family income per capita, number of child, whether the elderly live with their children.

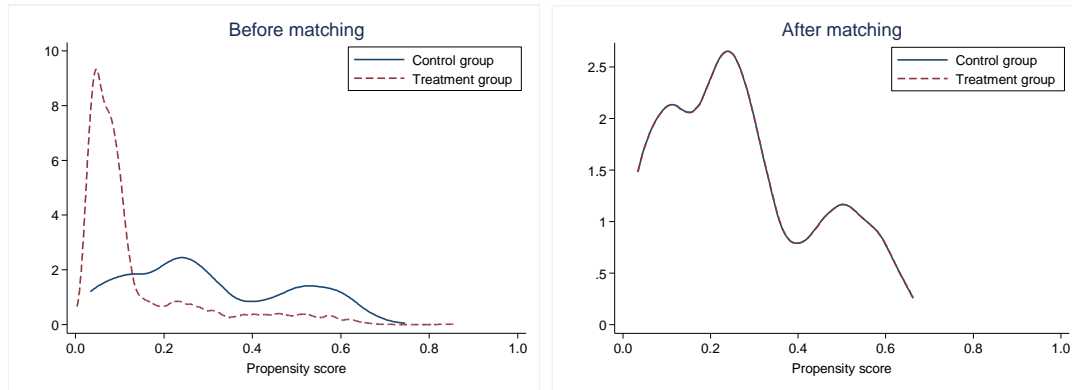

**Figure A1. Kernel density of treatment group and control group: before matching and after matching**
